# Supplementary material for: Optimizing the metal ion release and antibacterial activity of ZnO@ZIF-8 by modulating its synthesis method
Source: Royal Society of Chemistry journal article supplement (doi:10.1039/d1nj04534b), 2021-01-01
Supplement: d1nj04534b1.pdf [file d1nj04534b1.pdf]

## Supplementary Information

### **Optimizing the Metal Ion Release and Antibacterial Activity of ZnO@ZIF-8 by Modulating its Synthesis Method**

Mona Kalati, Kamran Akhbari\*

School of Chemistry, College of Science, University of Tehran, Tehran, Iran.

P.O. Box 14155-6455; Tel.: +98 21 61113734; fax: +98 21 66495291. E-mail address:

[akhbari.k@khayam.ut.ac.ir](mailto:akhbari.k@khayam.ut.ac.ir)

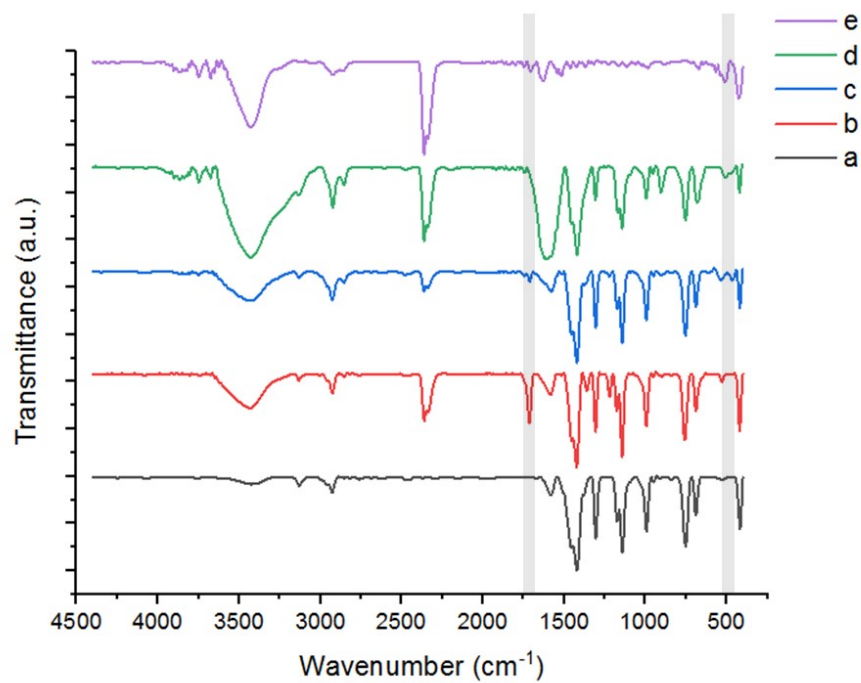

**Figure S1.** FT-IR spectra of pure guest free ZIF-8 (a),  $[\text{Zn}(\text{CH}_3\text{COO})_2 \cdot 2\text{H}_2\text{O}]_{0.227}@\text{ZIF-8}$  (b),  $[\text{ZnO}]_{0.181}@\text{ZIF-8}$  (c),  $[\text{ZnO}]_{0.09}@\text{ZIF-8}$  (d) and ZnO (e).

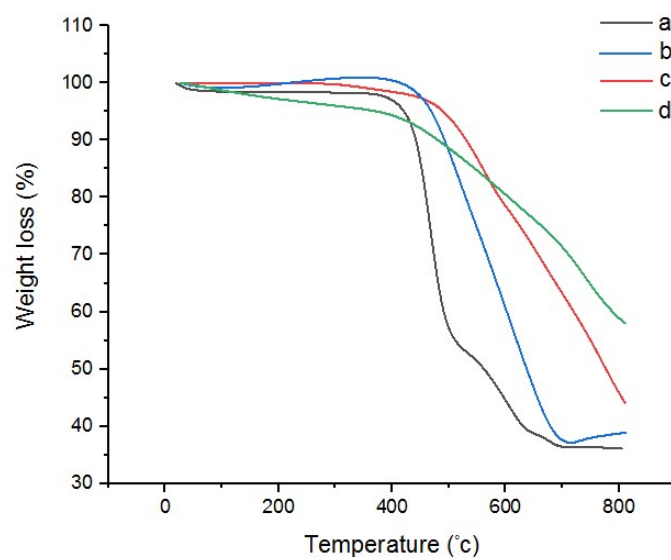

**Figure S2.** TGA curves of ZIF-8 (a),  $[\text{Zn}(\text{CH}_3\text{COO})_2 \cdot 2\text{H}_2\text{O}]_{0.227}@\text{ZIF-8}$  (b),  $[\text{ZnO}]_{0.181}@\text{ZIF-8}$  (c) and  $[\text{ZnO}]_{0.09}@\text{ZIF-8}$  (d).

**Table S1** The special surface area and mean pore diameter of ZIF-8,  $[\text{Zn}(\text{CH}_3\text{COO})_2 \cdot 2\text{H}_2\text{O}]_{0.227}@\text{ZIF-8}$ ,  $[\text{ZnO}]_{0.181}@\text{ZIF-8}$  and  $[\text{ZnO}]_{0.09}@\text{ZIF-8}$ .

| <b>Sample</b>                                                                         | <b><math>a_{s,\text{BET}}</math></b> | <b>Mean pore diameter</b> |
|---------------------------------------------------------------------------------------|--------------------------------------|---------------------------|
| ZIF-8                                                                                 | 1529.9 $\text{m}^2\text{g}^{-1}$     | 2.0137 nm                 |
| $[\text{Zn}(\text{CH}_3\text{COO})_2 \cdot 2\text{H}_2\text{O}]_{0.227}@\text{ZIF-8}$ | 1469.7 $\text{m}^2\text{g}^{-1}$     | 1.7930 nm                 |
| $[\text{ZnO}]_{0.181}@\text{ZIF-8}$                                                   | 1463.8 $\text{m}^2\text{g}^{-1}$     | 1.8248 nm                 |
| $[\text{ZnO}]_{0.09}@\text{ZIF-8}$                                                    | 147 $\text{m}^2\text{g}^{-1}$        | 3.5914 nm                 |
